# Supplementary material for: Aphid Odorant-Binding Protein 9 Is Narrowly Tuned to Linear Alcohols and Aldehydes of Sixteen Carbon Atoms
Source: MDPI journal article supplement (doi:10.3390/insects12080741), 2021-08-18
Supplement: s1 [file s1]

# Aphid Odorant-Binding Protein 9 Is Narrowly Tuned to Linear Alcohols and Aldehydes of Sixteen Carbon Atoms

**Chiara D'Onofrio<sup>1</sup>, Wolfgang Knoll<sup>1,2</sup>, Paolo Pelosi<sup>1\*</sup>**

<sup>1</sup>AIT Austrian Institute of Technology GmbH, Biosensor Technologies, Konrad-Lorenz Straße 24, 3430 Tulln, Austria.

<sup>2</sup>Department of Physics and Chemistry of Materials, Faculty of Medicine/Dental Medicine, Danube Private University, Krems, Austria

\*Paolo Pelosi

Austrian Institute of Technology GmbH, Biosensor Technologies, Konrad-Lorenz Straße, 24, 3430 Tulln, Austria. E.mail:  
ppelosi.obp@gmail.com; [paolo.pelosi@ait.ac.at](mailto:paolo.pelosi@ait.ac.at). Tel. +39 347 060 4288

## Supplementary Material

**Supplementary Table S1.** Ligands used in binding experiments and calculated dissociation constants with the WT and mutant (K37L) ApisOBP9. N.D.: not determined because at the highest concentration used quenching did not reach 50%. N.T.: not tested.

|                 | Ligand                          | N. Carbons | ApisOBP9-WT | ApisOBP9-m1 |
|-----------------|---------------------------------|------------|-------------|-------------|
| Alcohols        | 1-Decanol                       | 10         | N.D.        | N.D.        |
|                 | 1-Dodecanol                     | 12         | 3.79        | N.D.        |
|                 | 1-Tetradecanol                  | 14         | 3.41        | N.D.        |
|                 | 1-Hexadecanol                   | 16         | 1.90        | N.D.        |
|                 | (Z)-11-Hexadecen-1-ol           | 16         | 1.37        | N.D.        |
|                 | 1-Octadecanol                   | 18         | N.D.        | N.D.        |
| Aldehydes       | Decanal                         | 10         | N.D.        | N.D.        |
|                 | Dodecanal                       | 12         | N.D.        | N.D.        |
|                 | (Z)-9-Tetradecenal              | 14         | 5.31        | N.D.        |
|                 | (Z)-9-Hexadecenal               | 16         | 1.44        | N.D.        |
|                 | (Z)-11-Hexadecenal              | 16         | 1.14        | N.D.        |
|                 | (Z)-13-Octadecenal              | 18         | 2.28        | N.D.        |
| Esters          | Ethyl decanoate                 | 12         | N.D.        | N.D.        |
|                 | Ethyl laurate                   | 14         | N.D.        | N.D.        |
|                 | (Z)-7-Dodecenyl acetate         | 14         | 1.38        | N.D.        |
|                 | Ethyl myristate                 | 16         | N.D.        | N.D.        |
|                 | Ethyl palmitate                 | 18         | N.D.        | N.D.        |
|                 | (Z)-11-16-Acetate               | 16         | N.D.        | N.D.        |
| Acids           | Decanoic acid                   | 10         | 14.5        | N.D.        |
|                 | Lauric acid                     | 12         | N.D.        | N.D.        |
|                 | Myristic acid                   | 14         | N.D.        | N.D.        |
|                 | Palmitic acid                   | 16         | N.D.        | N.D.        |
|                 | Stearic acid                    | 18         | N.D.        | N.D.        |
|                 | Oleic acid                      | 18         | N.D.        | N.D.        |
|                 | Linoleic acid                   | 18         | N.D.        | N.D.        |
|                 | Coniferyl aldehyde              | 10         | 7.89        | 8.78        |
| Other compounds | Safranal                        | 10         | 11.38       | 16.9        |
|                 | Citral                          | 10         | N.D.        | N.T.        |
|                 | $\alpha$ -Methoxycinnamaldehyde | 10         | N.D.        | N.T.        |
|                 | Ocimene                         | 10         | N.D.        | N.T.        |
|                 | $\beta$ -farnesene              | 15         | N.D.        | N.T.        |
|                 | Farnesol                        | 15         | N.D.        | N.T.        |
|                 | Methyl jasmonate                | 13         | N.D.        | N.T.        |
|                 | Methyl salicylate               | 8          | N.D.        | N.T.        |
|                 | Neryl acetate                   | 12         | N.D.        | N.T.        |
|                 | Geranyl acetone                 | 13         | N.D.        | N.T.        |
|                 | Eugenol                         | 10         | N.D.        | N.T.        |
|                 | $\beta$ -Ionone                 | 13         | N.D.        | N.T.        |

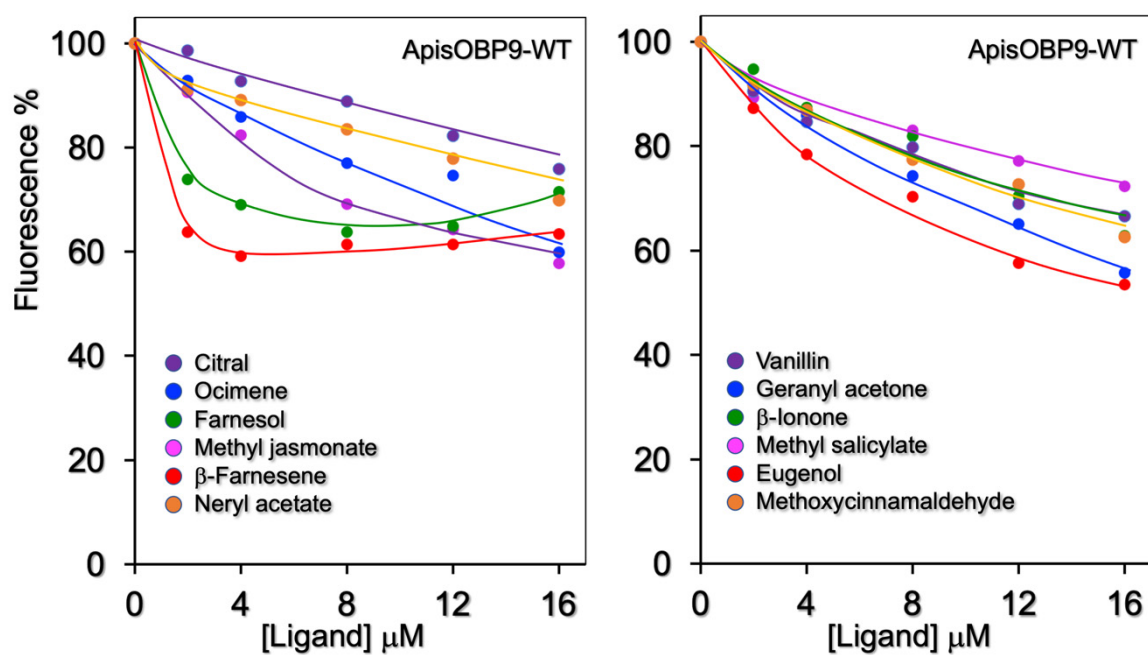

**Supplementary Fig. S1.** Competitive binding curves of common plant volatiles to ApisOBP9.

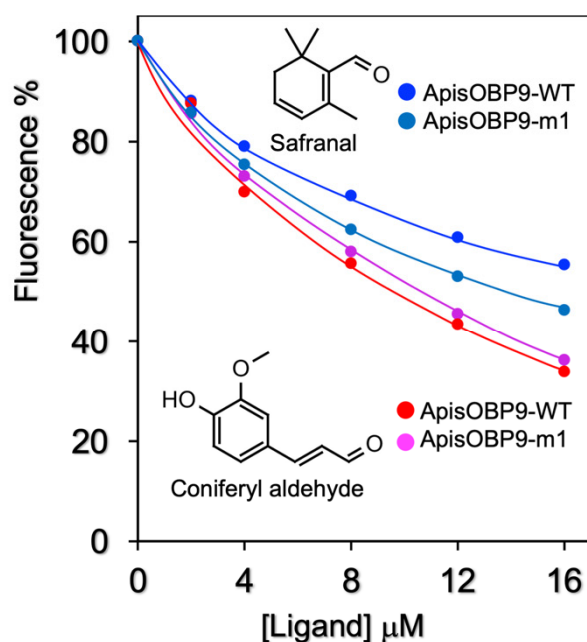

**Supplementary Fig. S2.** Competitive binding curves of safranal and coniferyl aldehyde to ApisOBP9-WT and mutant ApisOBP9-m1 (K37L).

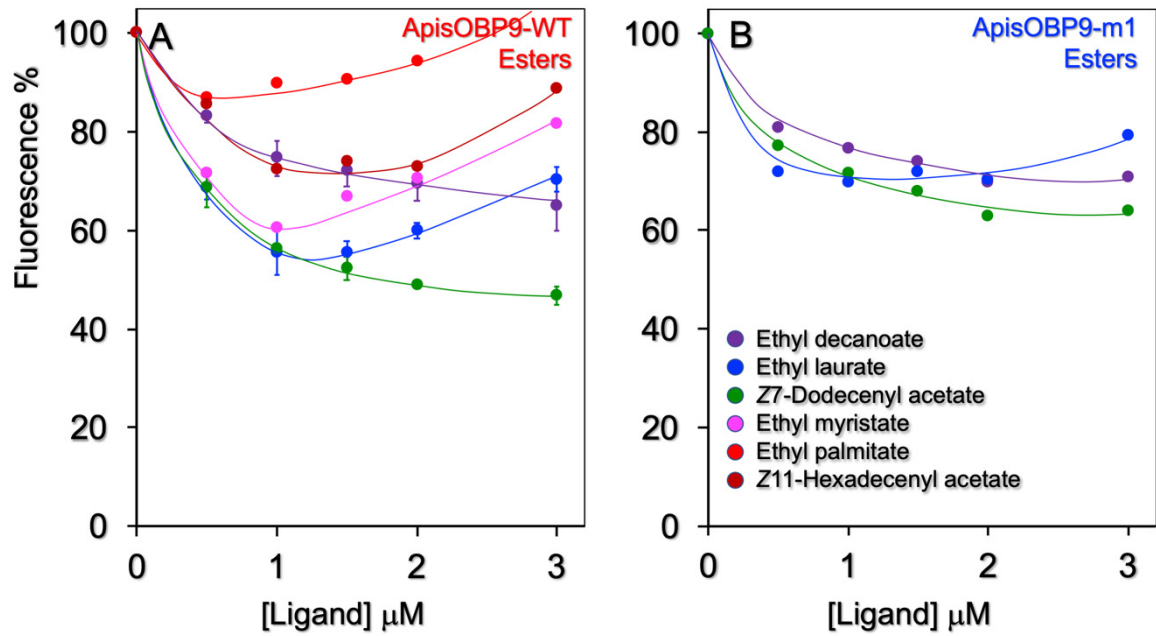

**Supplementary Fig. S3.** Competitive binding curves of some long-chain esters to ApisOBP9-WT and mutant ApisOBP9-m1 (K37L).

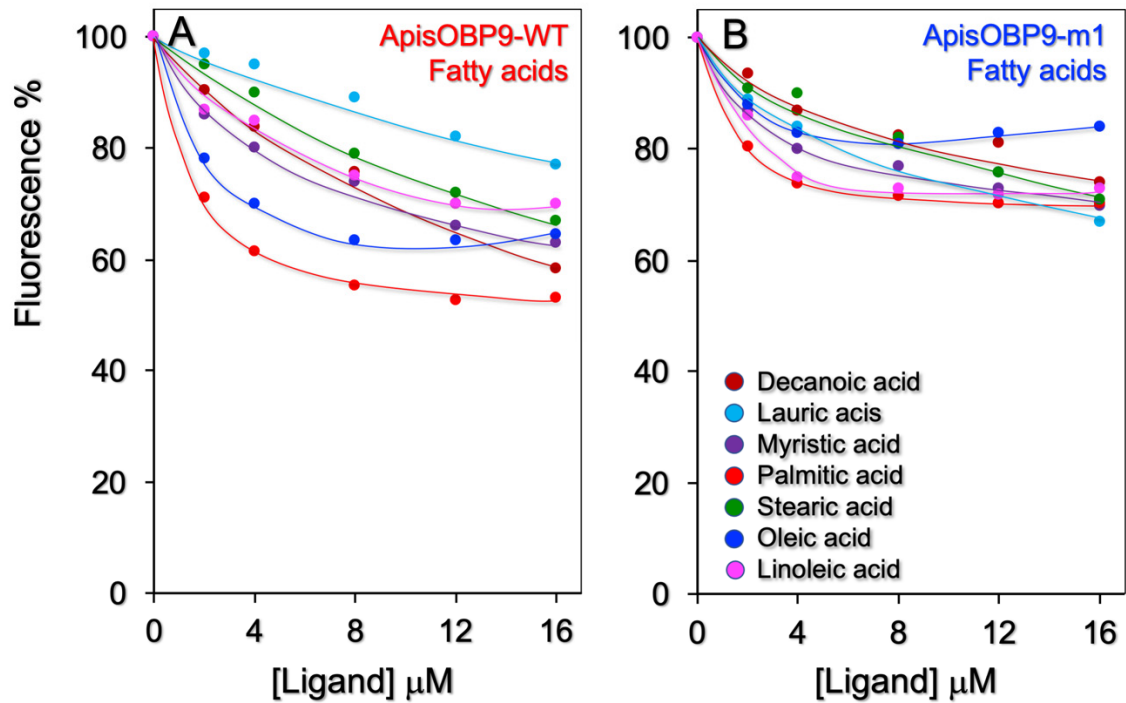

**Supplementary Fig. S4.** Competitive binding curves of some long-chain fatty acids to ApisOBP9-WT and mutant ApisOBP9-m1 (K37L).
